# Supplementary material for: Janus Nanostructures from ABC/B Triblock Terpolymer Blends
Source: PubMed Central journal article supplement (PMC6680841; doi:10.3390/polym11071107), 2019-06-30
Supplement: polymers-11-01107-s001.pdf [file polymers-11-01107-s001.pdf]

*Supporting Information*

*to*

**Janus nanostructures from ABC/B triblock terpolymer blends**

Andrea Steinhaus, Deepika Srivastva, Arash Nikoubashman, André H. Gröschel

**Supporting Figures**

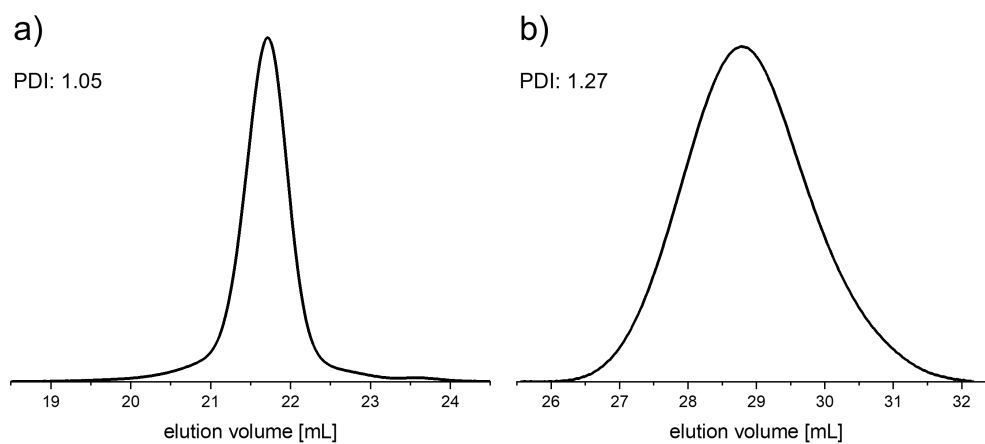

**Figure S1: SEC elugrams of the used polymers. a) SBM triblock terpolymer and b) the polybutadiene homopolymer hPB.**

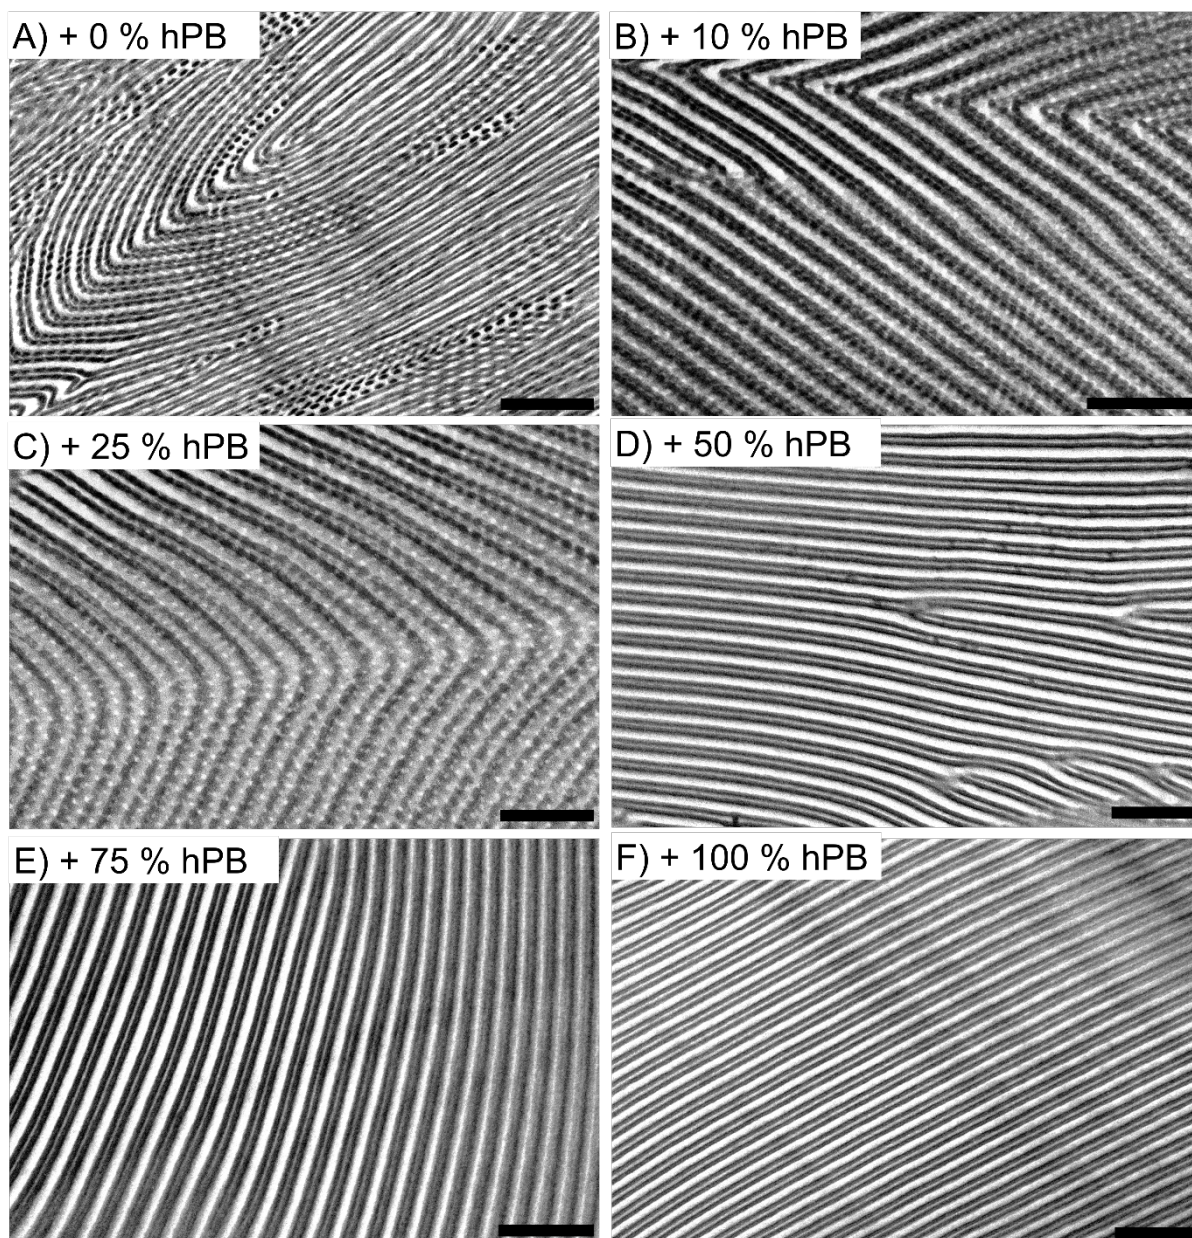

**Figure S2: TEM overview images of morphologies cross-linked with S<sub>2</sub>Cl<sub>2</sub>. Added content of hPB indicated in the figure labels. Scale bar 200 nm.**

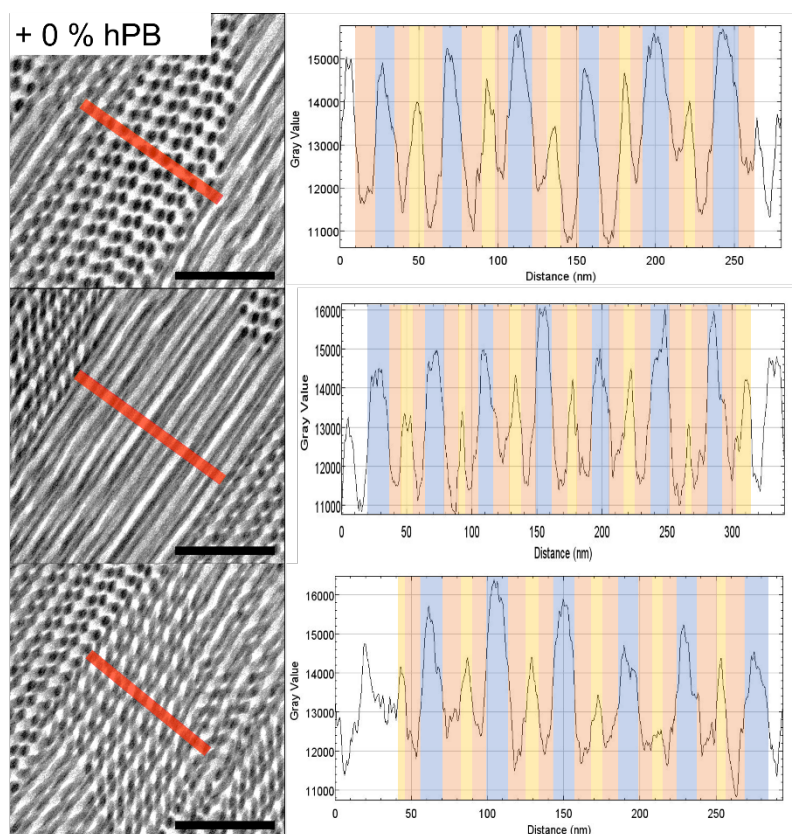

**Figure S3:** Grey scale analysis of selected locations of the bulk morphology with 0% hPB blending. Scale bar 200 nm.

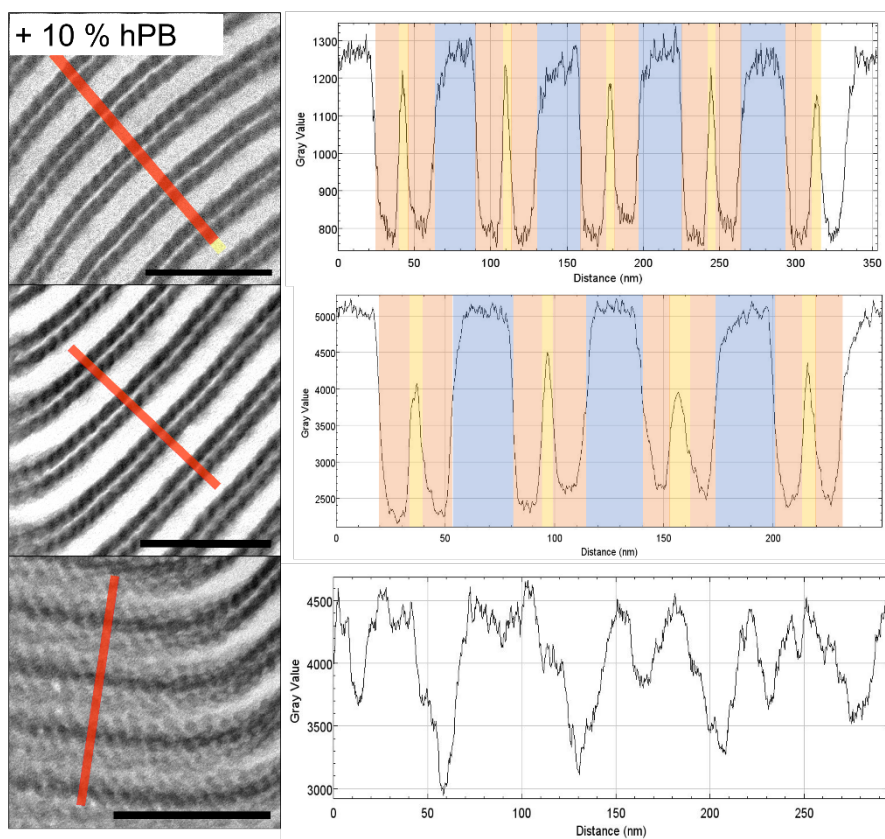

**Figure S4:** Grey scale analysis of selected locations of the bulk morphology with 10% hPB blending. Scale bar 200 nm.

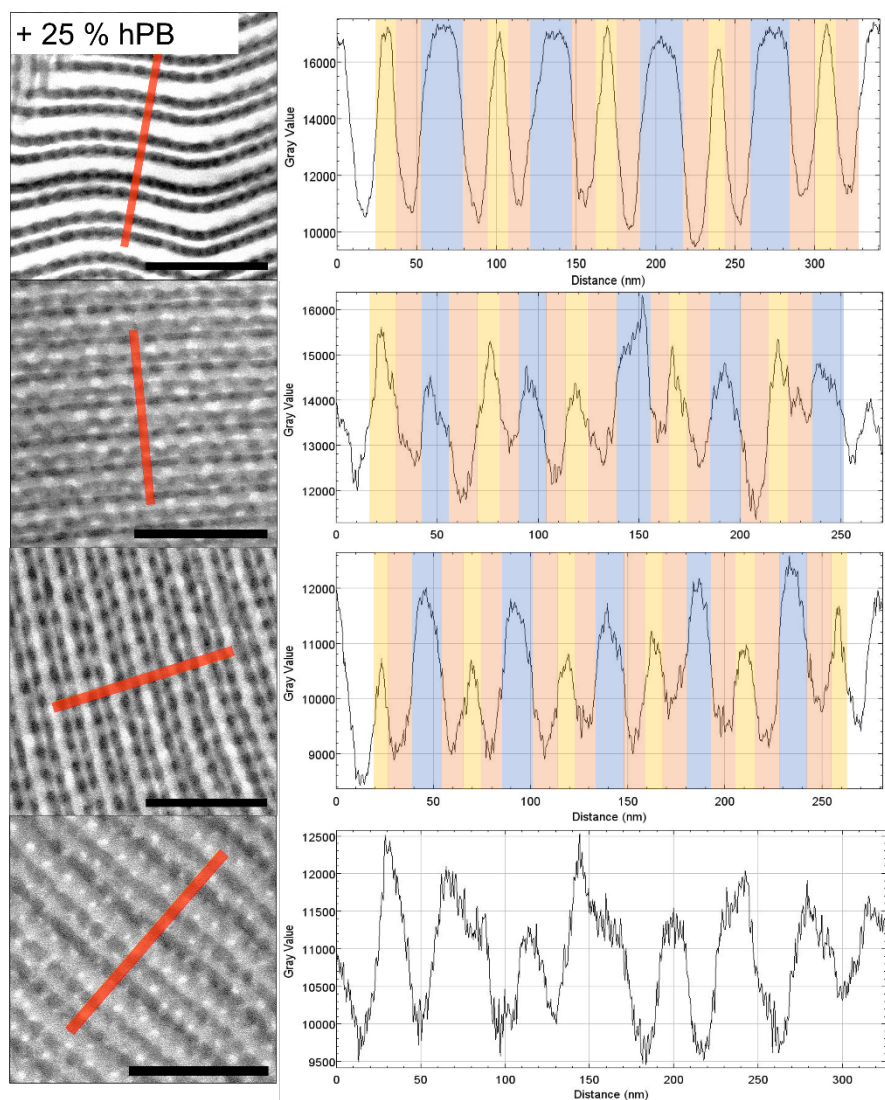

**Figure S5:** Grey scale analysis of selected locations of the bulk morphology with 25% hPB blending. Scale bar 200 nm.

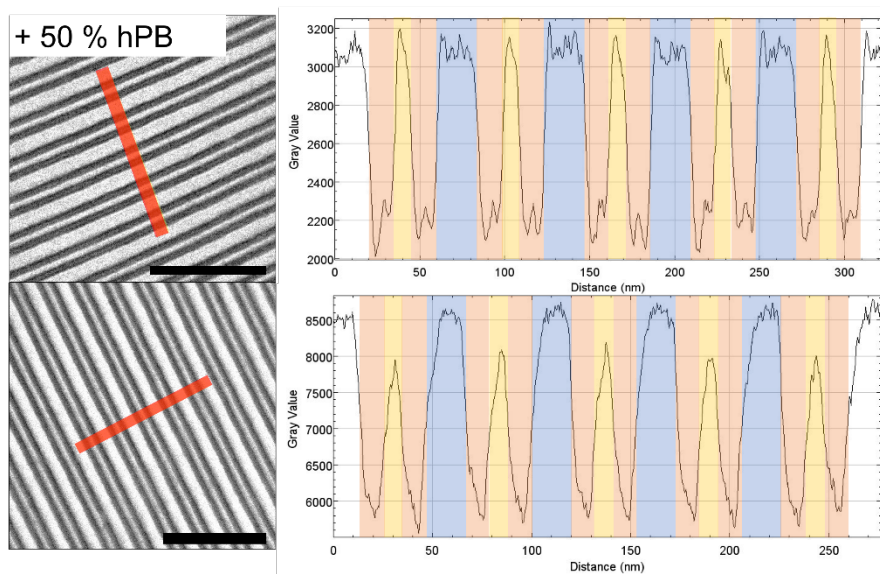

**Figure S6:** Grey scale analysis of selected locations of the bulk morphology with 50% hPB blending. Scale bar 200 nm.

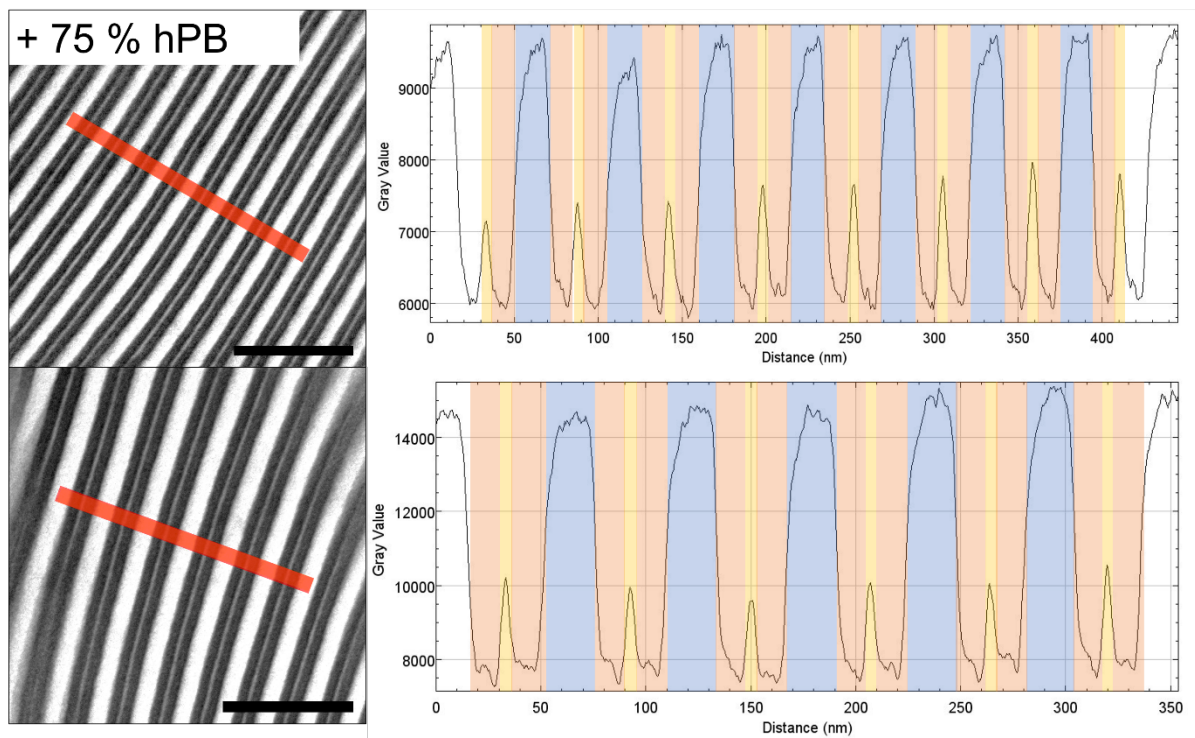

**Figure S7:** Grey scale analysis of selected locations of the bulk morphology with 75% hPB blending. Scale bar 200 nm.

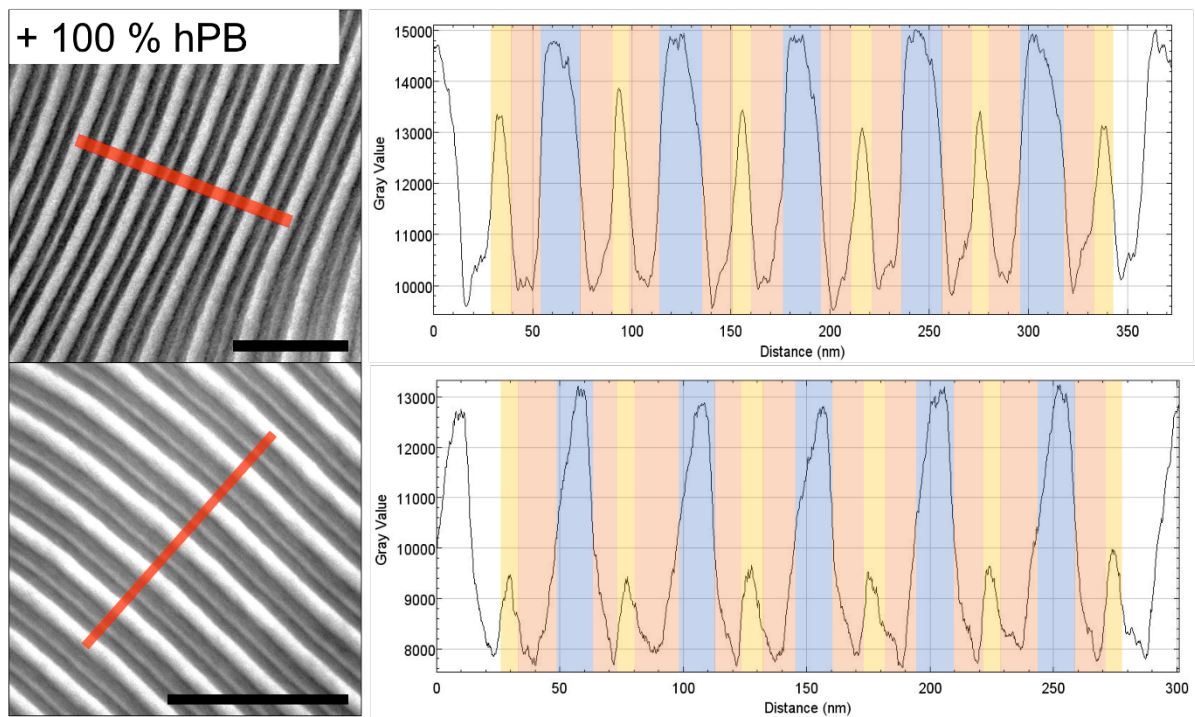

**Figure S8:** Grey scale analysis of selected locations of the bulk morphology with 100% hPB blending. Scale bar 200 nm.
